# Supplementary material for: A Tryptophan ‘Gate’ in the CRISPR-Cas3 Nuclease Controls ssDNA Entry into the Nuclease Site, That When Removed Results in Nuclease Hyperactivity
Source: PubMed Central journal article supplement (PMC8001533; doi:10.3390/ijms22062848), 2021-03-11
Supplement: ijms-22-02848-s001.pdf [file ijms-22-02848-s001.pdf]

## **SUPPORTING INFORMATION (SI)**

# **A tryptophan 'gate' in the CRISPR-Cas3 nuclease controls ssDNA entry into the nuclease site, that when removed results in nuclease hyperactivity.**

**Liu He<sup>1</sup>, Zoe Jelić Matošević<sup>3</sup>, Damjan Mitić<sup>2</sup>, Dora Markulin<sup>2</sup>, Tom Killelea<sup>1</sup>, Marija Matković<sup>4</sup>, Branimir Bertoša<sup>3</sup>, Ivana Ivančić-Baće<sup>2\*</sup> and Edward L. Bolt<sup>1\*</sup>**

<sup>1</sup> School of Life Sciences, University of Nottingham, United Kingdom.

<sup>2</sup> Department of Biology, Faculty of Science, University of Zagreb, Croatia.

<sup>3</sup> Department of Chemistry, Faculty of Science, University of Zagreb, Croatia.

<sup>4</sup> Institute Ruđer Bošković, Zagreb, Croatia.

\* Correspondence: ed.bolt@nottingham.ac.uk or iibace@biol.pmf.hr

### **Contents of Supporting Information:**

- 1. Supplementary materials.** Strains and plasmids used in this study.
- 2. Figure S1.** Fork DNA substrate.
- 3. Figure S2.** CD monitoring of wild type Cas3 thermal denaturation.
- 4. Figure S3.** EMSAs showing wild-type Cas3 and Cas3<sup>W406A</sup> DNA-protein complexes.
- 5. Figure S4.** CD monitoring of Cas3<sup>W406A</sup> thermal denaturation.
- 6. Figure S5.** Quantification of the distance between the centre of phenyl rings of Trp-230 and Trp-406 and the most prominent hydrophobic interactions made by Trp-406 during the molecular dynamics (MD) simulations.
- 7. Figure S6.** Sequence alignment of *E. coli* Cas3 with the templates provided by SwissModel server.
- 8. Figure S7.** Root mean square deviations (RMSD) of the protein backbone C $\alpha$  atoms during the MD simulations.
- 9. Table S1.** List of strains used in this study.
- 10. Table S2.** List of oligonucleotides used in this study.
- 11. Table S2.** Summary of molecular dynamics simulations conducted for different systems of *E. coli* Cas3 protein.
- 12. Supplementary references.**

### **Supplementary materials**

#### **Strains and plasmids**

The *E. coli* K-12 strains used in this study are described in the **Table S1**. Plasmids used were: pKOV (Link et al. 1997), pAH4 (*cas3* cloned into Bad-HisA using XhoI and EcoRI), pIIB39 (mutagenized pAH4 in W406A residue) using primers listed in Table 2 (oligos), pEB526 (Cas3 cloned in pUC19) (1). Plasmid pCas3 is described in (2).

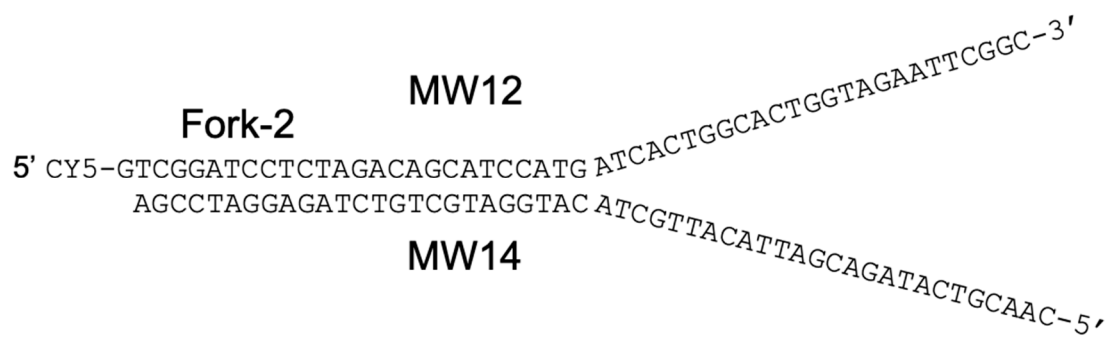

**Figure S1. Fork DNA substrate.** DNA oligos MW12 and MW14 were annealed to form a DNA fork substrate with 25 base pairs double-stranded region and extended two single-stranded 25 nt arms. A Cy5 fluorescent dye oligonucleotide labelling was incorporated at 5'-end of MW12 that has a maximal absorbance at 646 nm.

i

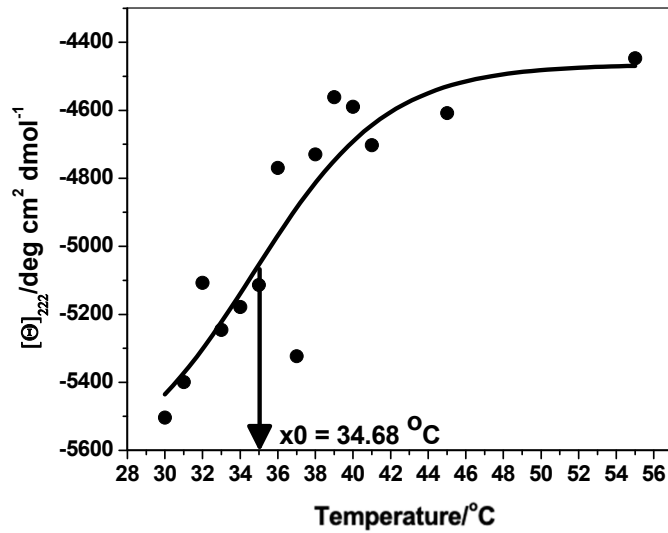

ii

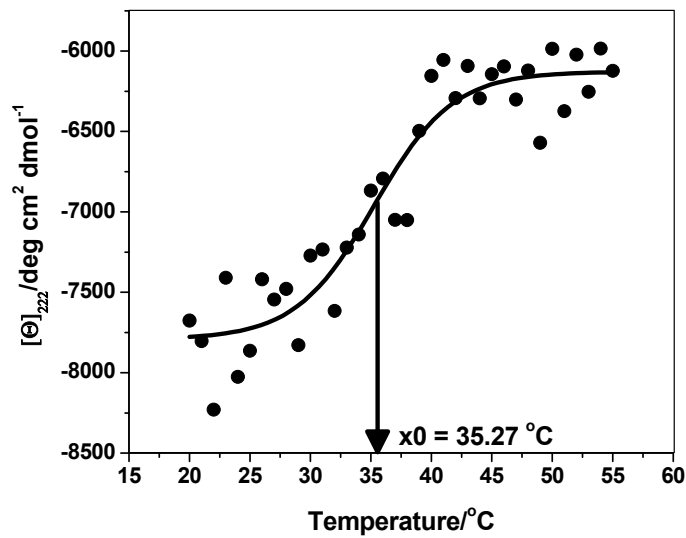

iii

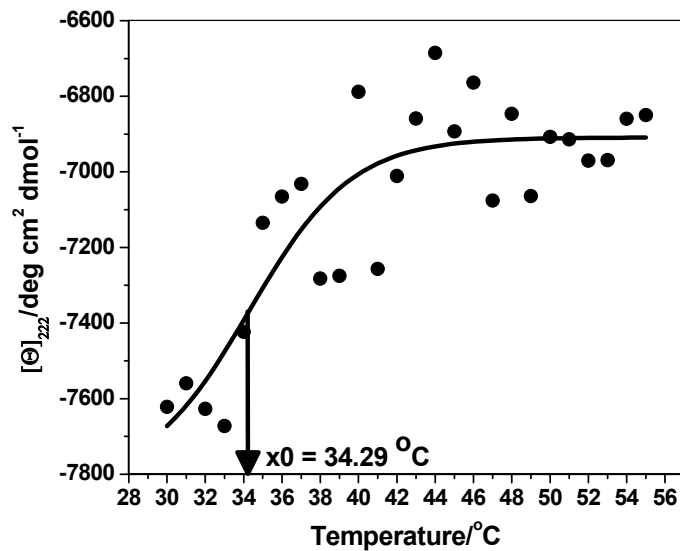

**Figure S2. CD monitoring of wild type Cas3 thermal denaturation. (i).** Replica1. CD monitoring of Cas3 thermal denaturation. Changes at 222 nm in temperature range 30-55 °C presented as mean residue ellipticity (MRE) vs Temperature ( $[Q]_{222}$  vs T): • experimental data — Boltzmann fit of experimental data; Boltzmann sigmoid value  $x_0=34.68$  °C;  $|\Delta MRE_{\text{exp}}| = |MRE_{30} - MRE_{55}| = 1056.56$

degcm<sup>2</sup>dmol<sup>-1</sup>, 19.2 %↓. **(ii)**. Replica2. CD monitoring of Cas3 thermal denaturation. Changes at 222 nm in temperature range 20-55 °C presented as mean residue ellipticity (MRE) vs Temperature ([Q]<sub>222</sub>vsT): • experimental data — Boltzmann fit of experimental data; Boltzmann sigmoid value x<sub>0</sub>=35.27 °C; |ΔMRE<sub>expl</sub>|=|MRE<sub>20</sub>-MRE<sub>55</sub>|= 1552.74 degcm<sup>2</sup>dmol<sup>-1</sup>, 20.2 %↓. **(iii)**. Replica3. CD monitoring of Cas3 thermal denaturation. Changes at 222 nm in temperature range 30-55 °C presented as mean residue ellipticity (MRE) vs Temperature ([Q]<sub>222</sub>vsT): • experimental data — Boltzmann fit of experimental data; Boltzmann sigmoid value x<sub>0</sub>=34.29 °C; |ΔMRE<sub>expl</sub>|=|MRE<sub>30</sub>-MRE<sub>55</sub>|= 771.81 degcm<sup>2</sup>dmol<sup>-1</sup>, 10.1 %↓.

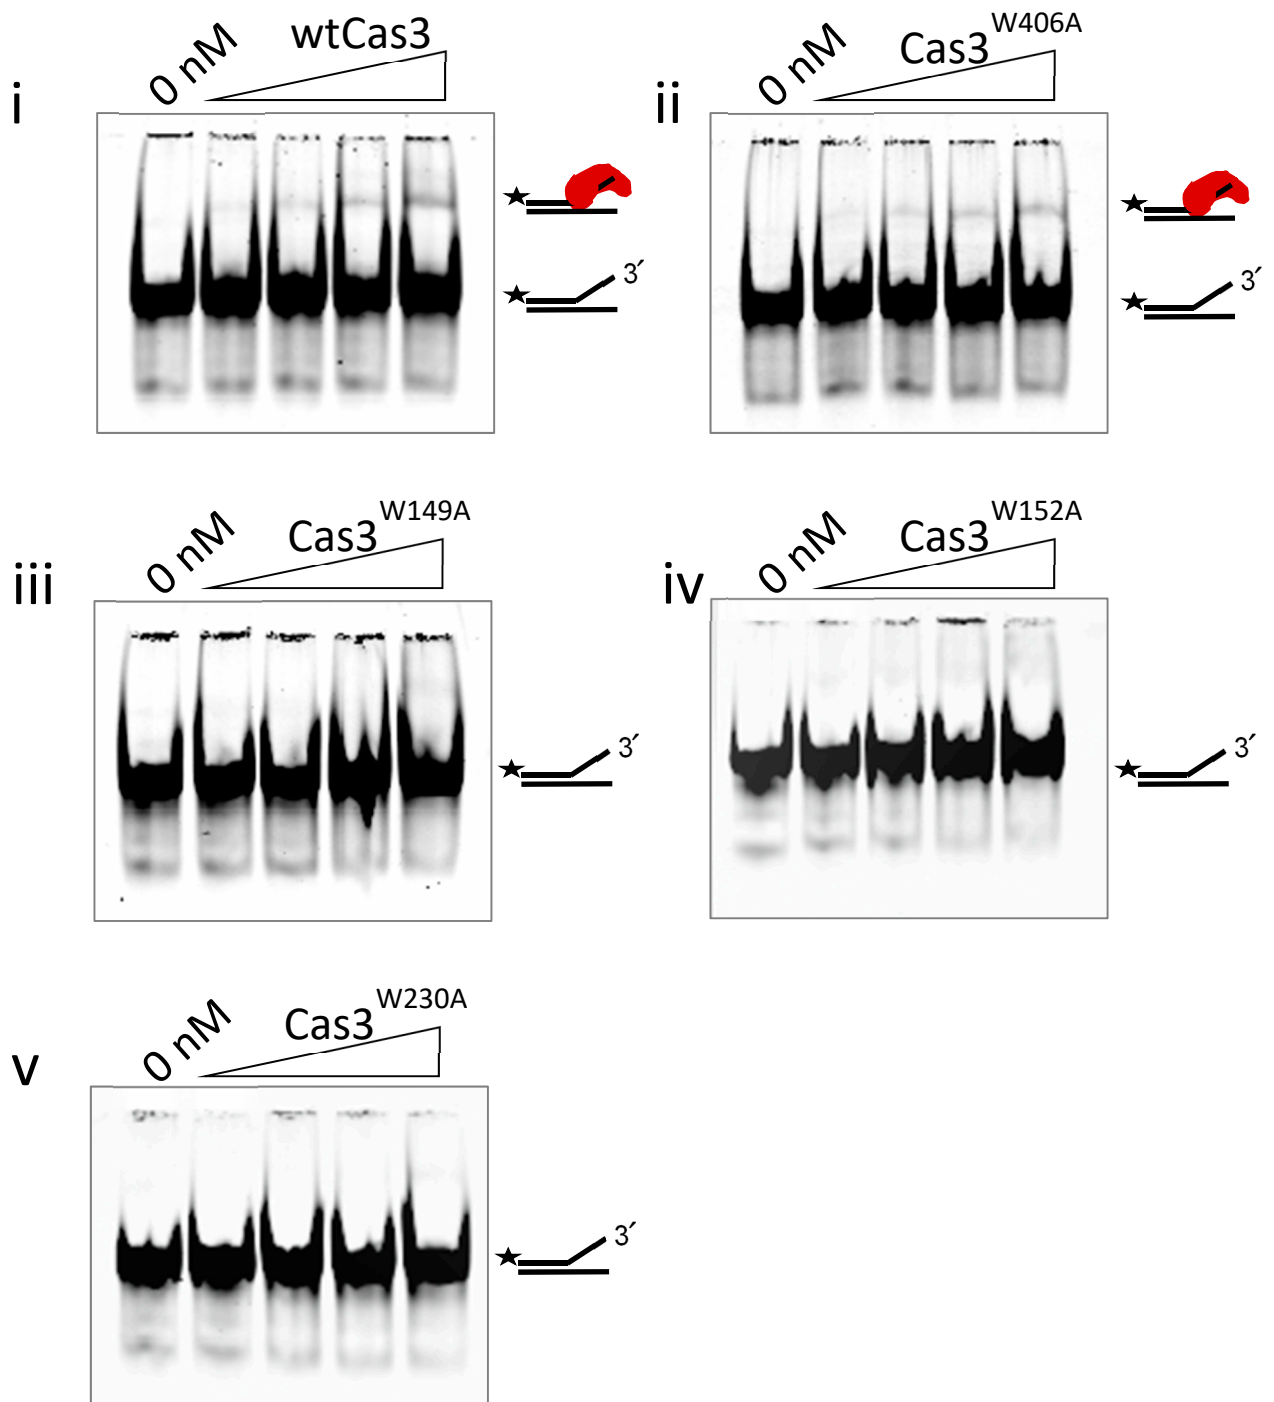

**Figure S3. EMSAs showing wild-type Cas3 and Cas3<sup>W406A</sup> DNA-protein complexes.** EMSAs show that wild-type Cas3 and Cas3<sup>W406A</sup> form stable DNA-protein complex (panels i and ii), but other mutant proteins do not (panels iii, iv and v). Increasing concentrations of Cas3 and mutant proteins (0, 0.4 0.8, 1.6 and 3.3 μM) were incubated with DNA fork (20 nM). Stable DNA-protein complex is indicated.

Inflection point: 37.2 °C

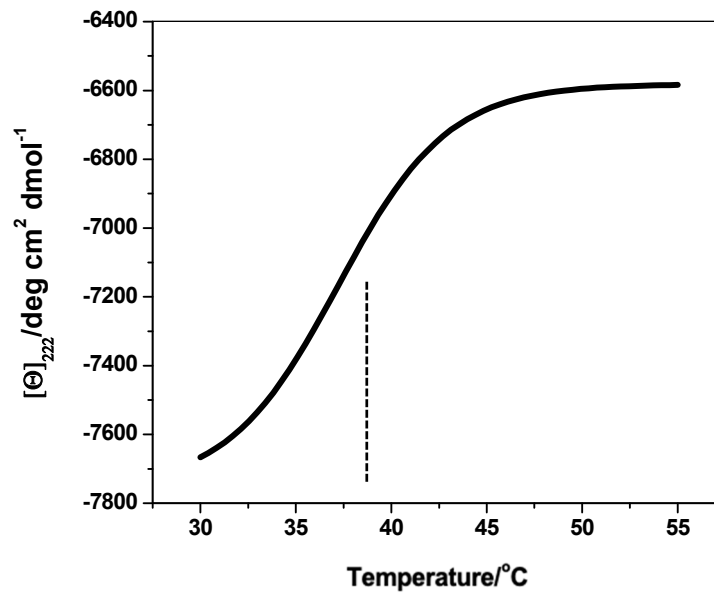

**Figure S4. CD monitoring of Cas3<sup>W406A</sup> thermal denaturation.** Changes at 222 nm in temperature range 30-55 °C presented as mean residue ellipticity (MRE) vs Temperature ([Θ]<sub>222</sub> vs T): • experimental data — Boltzmann fit of experimental data; Boltzmann sigmoid value x<sub>0</sub>=37.20 °C; |ΔMRE<sub>expl</sub>|=|MRE<sub>30</sub>-MRE<sub>55</sub>|=1730.4 deg cm<sup>2</sup> dmol<sup>-1</sup>, 14.0 % ↓.

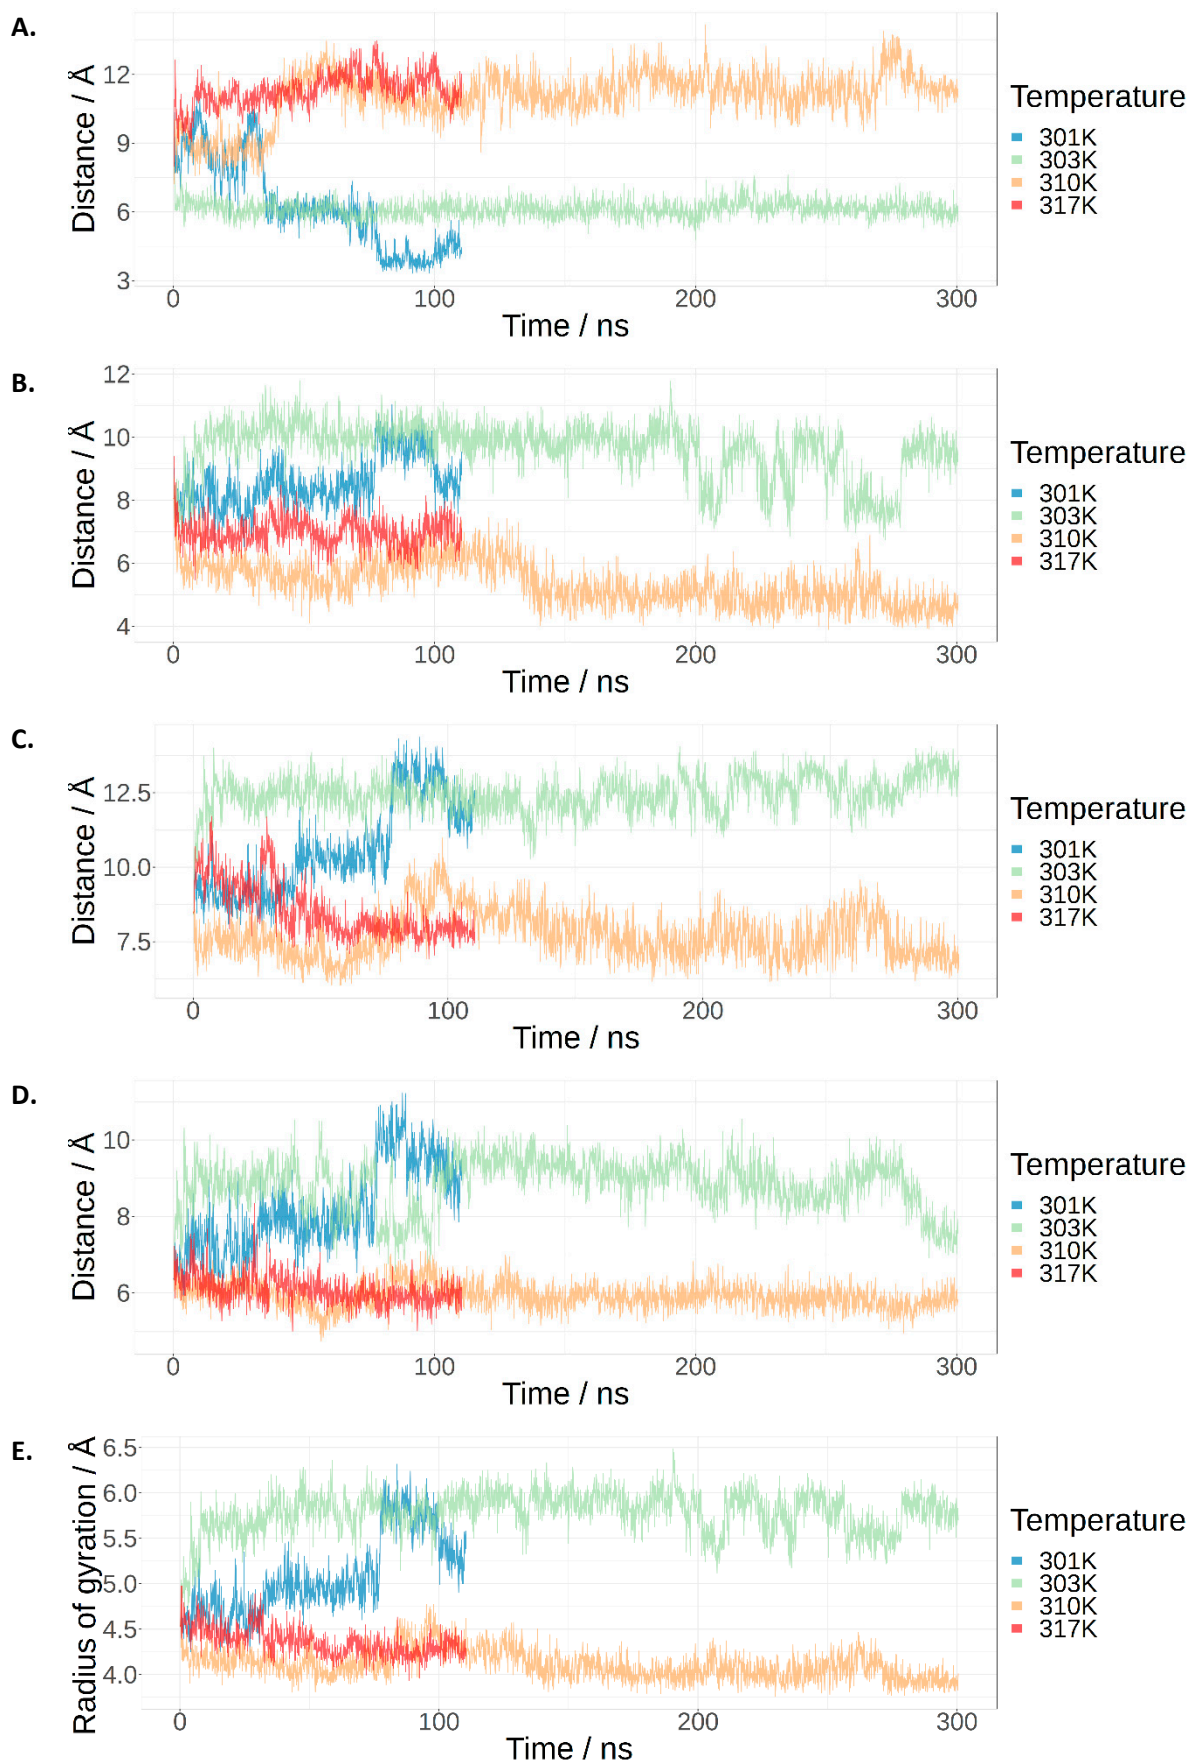

**Figure S5.** The distances between the centre of phenyl rings of Trp-230 and Trp-406 and the most prominent interactions that Trp-406 forms with the aliphatic part of sidechains of residues Val-415, Gln-426 and Arg-440 when entering a hydrophobic pocket at higher temperatures. The data shown

is from simulations of wild-type Cas3 protein complex with  $Mg^{2+}$  and ATP at 28 °C, 30 °C, 37 °C, and 44 °C. **A.** The distance between the sidechains of residues Trp-230 and Trp-406. **B.** The distance between the sidechains of residues Trp-406 and Val-415. **C.** The distance between the sidechain of Trp-406 and the aliphatic part of Gln-426 sidechain. **D.** The distance between the sidechain of Trp-406 and the aliphatic part of Arg-440 sidechain. **E.** The radius of gyration for the sidechains of Trp-406 and Val415 and the aliphatic part of Gln-425 and Arg-440 sidechains.





**B.**

```

Model/1-888 1 ME PFKY ICH YWGX SSKSLTKGNDI HLLIYHCLDVAAVADCWWDQSVV - - LQNTFC 53
4QQW/1-929 1 - - - PLDLRFWAK ERG - - - LRGKTYPLVCHSLDAAAAALVLWNEYLS PGLRDTIA 48

Model/1-888 54 RNEMLSKQRVKA WLLFFIALHDIGKFDIRFQYKSAESWLKLN PATPSLNGPSTQM 108
4QQW/1-929 49 SSMETDEE HAHGHC IAFWAGLHDIGKLTREFQQQIA IDLSAYP - - - - - GEE - LS 95

Model/1-888 109 CRKFNHGAAGLYWFNQDLSLEQSLGDFFSFFDAA PHPYESWF PWVEAVTGHHGFI 163
4QQW/1-929 96 GEQRSHAAATGKWL PFAL - PSLGY P - - - - - N - GGLVTGLVAQMLGGHHGTF 139

Model/1-888 164 LHSQDQDKS R WEMPAS LAS YAAQDKQAR EEWISVLEALFLT PAGLSINDI PPDCS 218
4QQW/1-929 140 HPHPSFQS - RNPL - AEFGFSSPHWEKQRHALLHAVFDATGRPTPP - - DMLDGP TA 190

Model/1-888 219 SLLAGFCS LADWLGSWTTTNTFLFNEDA - - PSDINALRTYFQDRQQDASRVLEL 270
4QQW/1-929 191 SVVCGLVI LADWLV SQEDF - - LLERLTSLPADGSA SALRAHFETSLRRI PSL LDA 243

Model/1-888 271 SGLVSNKRCYEGVHALDNGYQPRQLQVLVDAL - - - PVA PGLTVIEAPTGS GKT 321
4QQW/1-929 244 AGLRPIITVPPATFTES FPHLSKPNGLQASLAKHL PCLCTG PGLVLITAPMGEGKT 298

Model/1-888 322 ETALAYAWKLI DQQIADSVIFALPTQATANAMLTRMEASASHLFS - - - - S PNL 370
4QQW/1-929 299 EAAYHVADLLGKATGR PGRFLALPTMATADQMHTRLKEYARYRVENTDLP RSSTL 353

Model/1-888 371 ILAHGNSRFNHLFQS IKSRAI - - - TEQGQEEAWVQC CQWLSQSNKKVFLGQIGVC 422
4QQW/1-929 354 ALLHSMAWLN PDYAPADL PGVSKVLSNLGHRDPFAATDWLMG - RKRGLLAPWAVG 407

Model/1-888 423 TIDQVLI SVLPVKHRFIRGLGIGRSVLIVDEVHAYDTYMNGLLEAVLKAQADVGG 477
4QQW/1-929 408 TIDQALMAVLR AKHNALRLFGLAGKVVVVDEAHAVDPYMQVLLQLLRWLGTL DV 462

Model/1-888 478 SVILLSATL P MKQKQLLD TYGLHTD - - - - - P - VENNSAYPLINWRGVNGAQ 523
4QQW/1-929 463 PVVLLSATL HHS IANS LVKAYLE GARGRRWNRSE P QPVSEVS YPGWLHV DARI GK 517

Model/1-888 524 RF - - - - DLLAHPEQL PPRFSIQPEPICLADM - LP - DLTMLERMIAAANAGA QVC 571
4QQW/1-929 518 VTRSSDV DPLPIATTPRKPLEVRLVDV PVK EGALNRS TVLAKELT PLVKQGGCAA 572

Model/1-888 572 LICNLVDVAQVCYQRLKELNN - - - - TQVDIDL F HARFTLNDRR EKENRVISNFGK 622
4QQW/1-929 573 IICTTVAEAGGVYDLS QWFATLGEDA PDL YLLHS RFPNRQRT EITATIVDLFGK 627

Model/1-888 623 NGK - - - - R - NVGRILVATQVVEQSLD VDFDWLITQHCPADLLFQRLGR LHRHHRK 672
4QQW/1-929 628 EGAQS GR RPTRGAVLVATQVVEQSLDLVDVLMISDLAPV SLLLQRAGRCWRHEHL 682

Model/1-888 673 - - - YRPAGFEIPVATILL PDGEG - - - - - YG - RHEHIYSNVRVMWR TQHQHIEEL 716
4QQW/1-929 683 GIINR PQWAKQPELVVLTPEQNGDADRAPWFP RSWTSVYPL - ALLQRTYTLLRRR 736

Model/1-888 717 NGASLFFPDAYRQWLD SIYDDAEMDEPEWVGNGMDKFESAECEKRFKARKVL - - - 768
4QQW/1-929 737 NGAPVQIPE DVQLVDDVYDDDSL - AEDLE - ADMERMG - EELAQRGLARNAV I PD 788

Model/1-888 769 - - - - - QWAE EYS LQ - DND E TILAVTRD GEMSLPLL PYVQTSSGKQLLDGQVYED 816
4QQW/1-929 789 PDDAEDNLNGLT EFSFDVDEHVLATRF GAGSVRVL CYVDITAGNRWLDPECTVEF 843

Model/1-888 817 - - - - - - - LSHEQQY EALALNRVNV PFT - WKRSFSE - - - VV - DEDGLLW - - - - 852
4QQW/1-929 844 PEQGTGREGRFTMADCRDLVARTIPVRMG P W A S Q L T E D N H P P E A W R E S F Y L R D L V 898

Model/1-888 853 - L E G K Q N L D G W - - V W Q G N S I V I T Y T G D E G M T R V I P A N P K 888
4QQW/1-929 899 L I P Q R V T D E G A V L P T E T G G R E W L D P C K G L I - - - - - 929

```

**Figure S6. Sequence alignment of *E. coli* Cas3 with the templates provided by SwissModel server. A.** Sequence alignment of *E. coli* Cas3 and *T. terrenum* Cas3 (PDB ID: 4Q2C). **B.** Sequence alignment of *E. coli* Cas3 and *T. fusca* Cas3 (PDB ID: 4QQW).

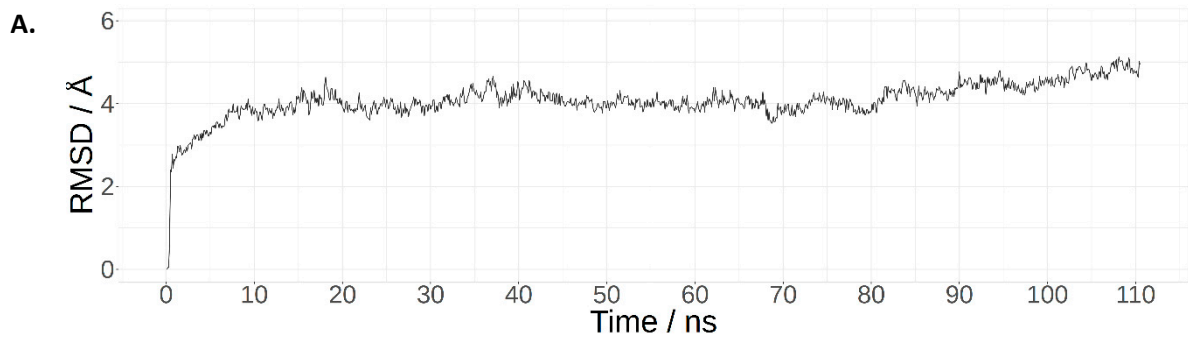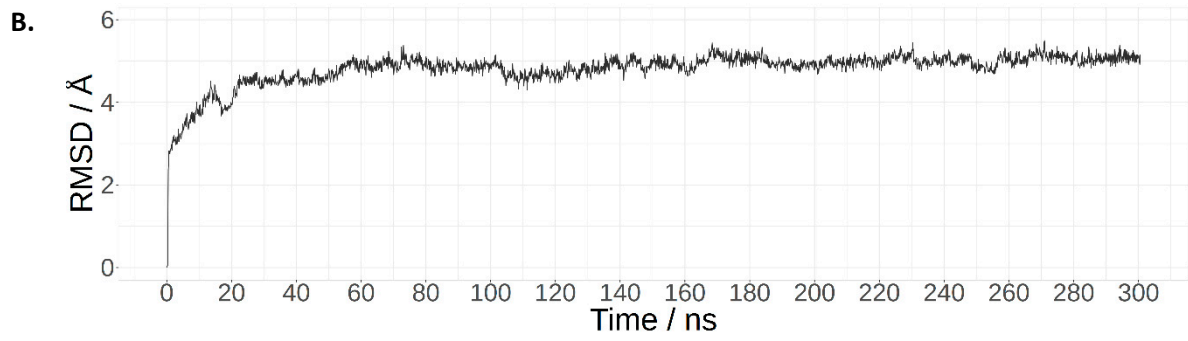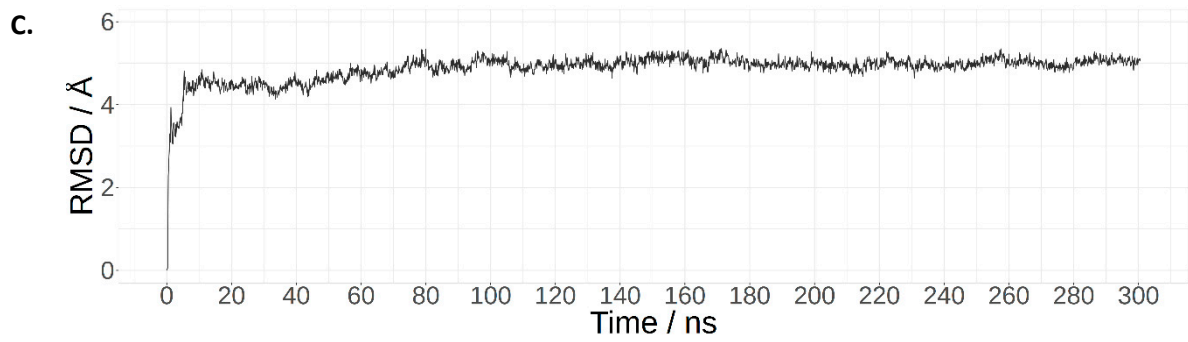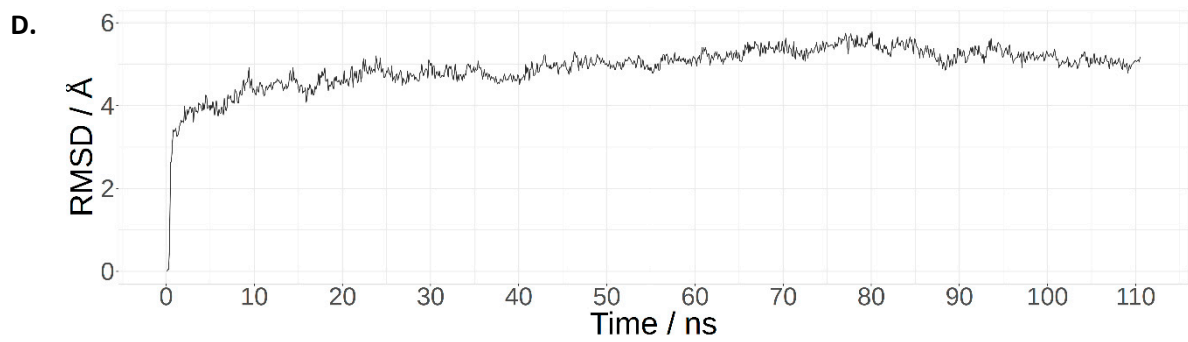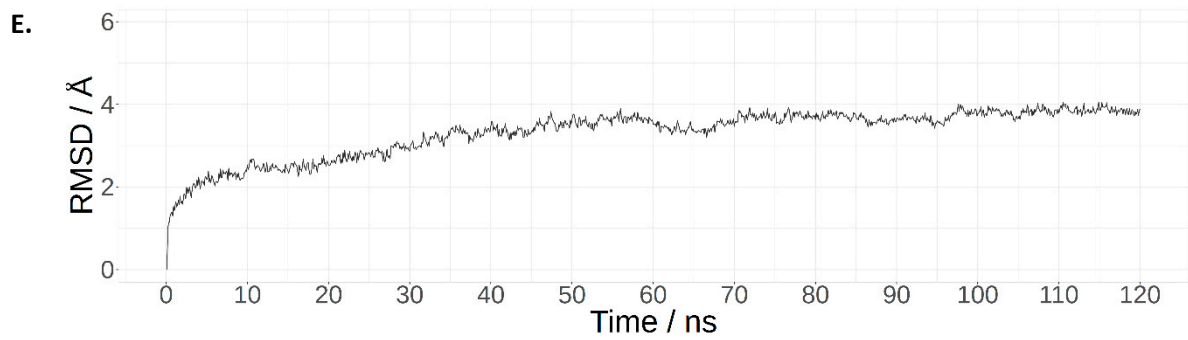



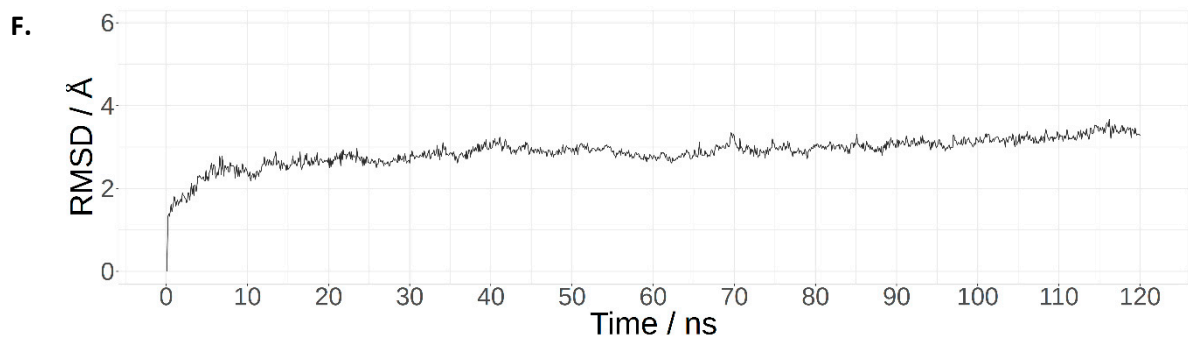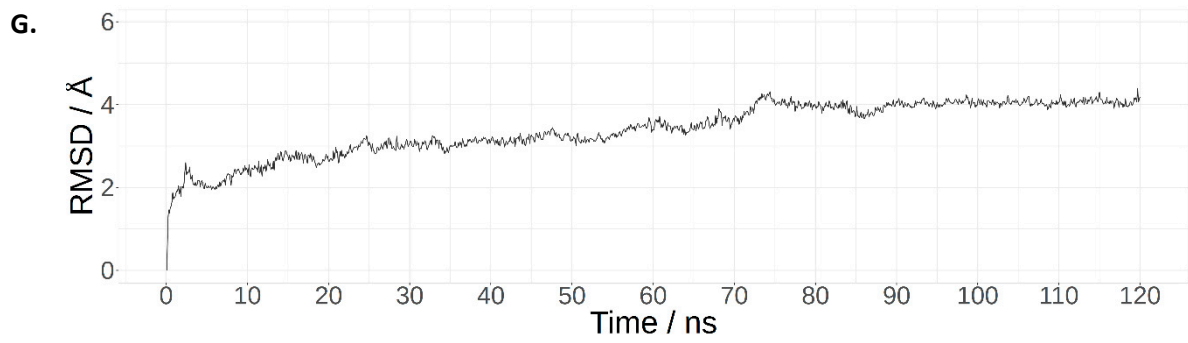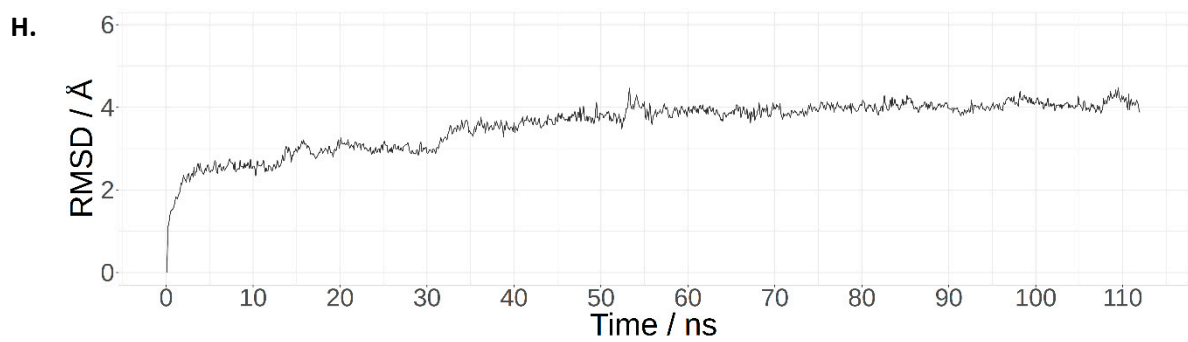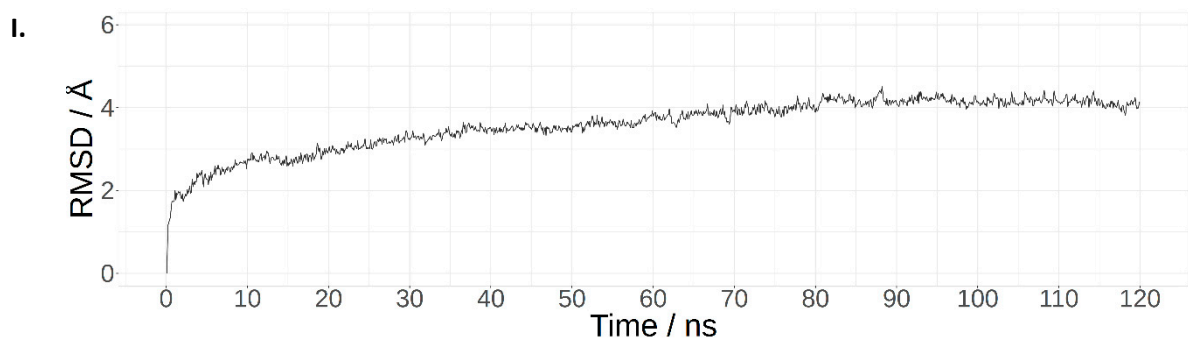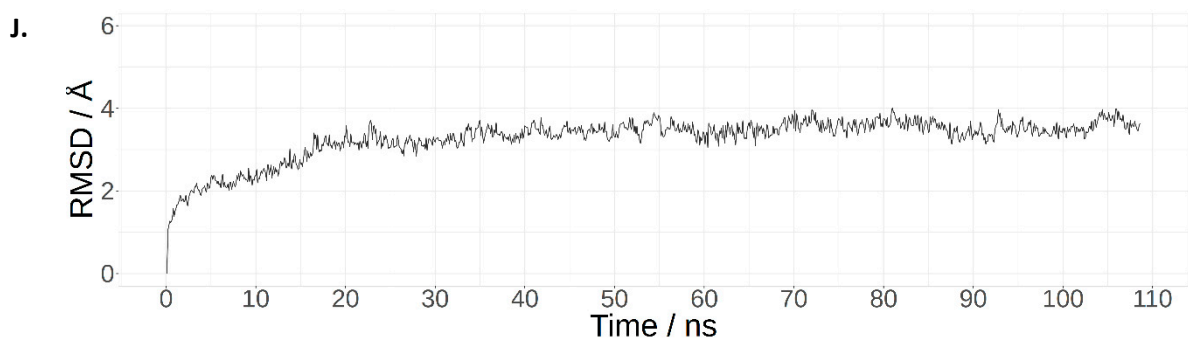

**Figure S7. Root mean square deviations (RMSD) of the protein backbone C $\alpha$  atoms.** **A.** RMSD for simulation of wild-type protein in complex with Mg<sup>2+</sup> and ATP at 301 K. **B.** RMSD for simulation of wild-type protein in complex with Mg<sup>2+</sup> and ATP at 303 K. **C.** RMSD for simulation of wild-type protein in complex with Mg<sup>2+</sup> and ATP at 310 K. **D.** RMSD for simulation of wild-type protein in complex with Mg<sup>2+</sup> and ATP at 317 K. **E.** RMSD for simulation of wild-type protein in complex with Mg<sup>2+</sup> and DNA at 303 K. **F.** RMSD for simulation of wild-type protein in complex with Mg<sup>2+</sup> and DNA at 310 K. **G.** RMSD for simulation of W230A mutant in complex with Mg<sup>2+</sup> and DNA at 303 K. **H.** RMSD for simulation of W230A mutant in complex with Mg<sup>2+</sup> and DNA at 310 K. **I.** RMSD for simulation of W406A mutant in complex with Mg<sup>2+</sup> and DNA at 303 K. **J.** RMSD for simulations of W406A mutant in complex with Mg<sup>2+</sup> and DNA at 310 K.

**Table S1. List of *E. coli* K-12 strains used in this study.**

| Bacterial strain | Relevant genotype                                                                                                                                                                                                    | Source or reference                                                                                          |
|------------------|----------------------------------------------------------------------------------------------------------------------------------------------------------------------------------------------------------------------|--------------------------------------------------------------------------------------------------------------|
| BW25113          | F <i>rrnB</i> $\Delta$ <i>lacZ4748</i> ( <i>::rrnB-3</i> ) <i>hsdR514</i><br>$\Delta$ ( <i>araBAD</i> )567 $\Delta$ ( <i>rhaBAD</i> )568 <i>rph-1</i> $\lambda$ <sup>-</sup><br>Bacterial strains related to BW25113 | (3)                                                                                                          |
| BW39121          | + $\Delta$ <i>hns::kan</i>                                                                                                                                                                                           | (4)                                                                                                          |
| IIB1040          | + $\lambda$ c + $\lambda$ T3 $\Delta$ <i>cas1::kan</i> $\Delta$ <i>hns::cat</i>                                                                                                                                      | (5)                                                                                                          |
| IIB1043          | + $\lambda$ c + $\lambda$ T3 $\Delta$ <i>cas1::FRT</i>                                                                                                                                                               | (5)                                                                                                          |
| IIB1309          | + $\lambda$ c + $\lambda$ T3 $\Delta$ <i>cas1::FRT</i> $\Delta$ <i>hns::kan</i>                                                                                                                                      | P1. BW39121 x IIB1043                                                                                        |
| IIB1342          | + $\lambda$ c + $\lambda$ T3 $\Delta$ <i>cas1::FRT</i> $\Delta$ <i>hns::kan</i> <i>cas3W406A</i>                                                                                                                     | Gene replacement of <i>cas3</i> with<br>allele <i>cas3</i> <sup>W406A</sup> using pKOV –<br>see main methods |

**Table S2. List of oligonucleotides used in this study.**

| Oligonucleotide Name                                       | Sequence from 5' to 3'                                 |
|------------------------------------------------------------|--------------------------------------------------------|
| <u>Primers for amplifying <i>ygcB</i> from genomic DNA</u> |                                                        |
| <i>ygcB</i> _Forward                                       | ATCGCTCGAGATAGAACCTTTTAAATATA                          |
| <i>ygcB</i> _Reverse                                       | ATCGGCATGCTCGAATTCTATTGGGATTGCAGGGA                    |
| <u>Primers for DNA substrate preparation</u>               |                                                        |
| Cas3HD_Forward                                             | GCCGCTCGAGGAACCTTTTAAATATATATGCCATT                    |
| W42A_Reverse                                               | GCAACAGCAGCAACATCA                                     |
| <u>Primers for site-direct mutagenesis</u>                 |                                                        |
| W149A_Forward                                              | TTATGAGTCCgcgTTTCCATGGGTAGAGGC                         |
| W149A_Reverse                                              | GGATGAGGAGCGGCATCA                                     |
| W152A_Forward                                              | CTGGTTTCCAgctGTAGAGGCCG                                |
| W152A_Reverse                                              | GACTCATAAGGATGAGGAG                                    |
| W230A_Forward                                              | GCTTGCTGACgctTTAGGCTCCTGG                              |
| W230A_Reverse                                              | GAGCAAAAACCTGCTAAC                                     |
| W406A_Forward                                              | GTGTTGTCAGgctTTGTCACAAAGCAATAAGAAAG                    |
| W406A_Reverse                                              | TGAACCCACGCTTCTTCT                                     |
| <u>Primers for allele replacement</u>                      |                                                        |
| FP-cas                                                     | TAAAAAACAGGGAGGCTATTAGAATTAACCATGGGGGGTTC              |
| RP-vector                                                  | ATCACTGAGATCATGTTGTAGCGCCCTTATTGGGATTGCAGGGATG         |
| FP-promoter                                                | CTATTGCTGGTTTANTCGGTACCCCAAGACATGTGTATATCACTG          |
| RP-promoter                                                | GAACCCCCATGGTTAATTCTAATAGCCTCCCTGTTTTTTAG              |
| pKOV-F                                                     | GCAAATTCGACCCGGTCGTC                                   |
| pKOV-R                                                     | GTTCTGACCGATAACATCACAGA                                |
| Ucas3                                                      | CGATATTTATGAGCAGCATC                                   |
| Downcas3                                                   | GATGTACATTGTGCACCTTC                                   |
| <u>Sequencing primer</u>                                   |                                                        |
| Cas3700                                                    | GGTTAGGCTCCTGGACTACAAC                                 |
| <u>Oligos for construct DNA fork substrate</u>             |                                                        |
| MW12                                                       | CY5-GTCGGATCCTCTAGACAGCTCCATGATCACTGGCACTGGTAGAATTCGGC |
| MW14                                                       | CAACGTCATAGACGATTACATTGCTACATGGAGCTGTCTAGAGGATCCGA     |
| CRISPR RNA targeting sequence                              | AGGCCCGCACCGATCGCCCTTCCCAACAGTTG                       |

**Table S3. Summary of molecular dynamics simulations conducted for different systems of *E. coli* Cas3 protein.**

|                 | wild-type                 |                           | W230A                     | W406A                     |
|-----------------|---------------------------|---------------------------|---------------------------|---------------------------|
|                 | Mg <sup>2+</sup> ,<br>ATP | Mg <sup>2+</sup> ,<br>DNA | Mg <sup>2+</sup> ,<br>DNA | Mg <sup>2+</sup> ,<br>DNA |
| Temperature / K | Time / ns                 |                           |                           |                           |
| <b>301</b>      | 110                       | X                         | X                         | X                         |
| <b>303</b>      | 300                       | 120                       | 120                       | 120                       |
| <b>310</b>      | 300                       | 120                       | 120                       | 120                       |
| <b>317</b>      | 110                       | X                         | X                         | X                         |

### Supplementary References

1. Ivancic-Bace, I., Radovic, M., Bockor, L., Howard, J.L. and Bolt, E.L. (2013) Cas3 stimulates runaway replication of a ColE1 plasmid in *Escherichia coli* and antagonises RNaseHI. *RNA Biol*, **10**, 770-778.
2. Mulepati, S. and Bailey, S. (2011) Structural and biochemical analysis of nuclease domain of clustered regularly interspaced short palindromic repeat (CRISPR)-associated protein 3 (Cas3). *J Biol Chem*, **286**, 31896-31903.
3. Datsenko, K.A. and Wanner, B.L. (2000) One-step inactivation of chromosomal genes in *Escherichia coli* K-12 using PCR products. *Proc Natl Acad Sci U S A*, **97**, 6640-6645.
4. Pougach, K., Semenova, E., Bogdanova, E., Datsenko, K.A., Djordjevic, M., Wanner, B.L. and Severinov, K. (2010) Transcription, processing and function of CRISPR cassettes in *Escherichia coli*. *Mol Microbiol*, **77**, 1367-1379.
5. Majsec, K., Bolt, E.L. and Ivancic-Bace, I. (2016) Cas3 is a limiting factor for CRISPR-Cas immunity in *Escherichia coli* cells lacking H-NS. *BMC Microbiol*, **16**, 28.
